# Supplementary material for: Evaluation of Reference Genes for RT-qPCR Studies in the Seagrass Zostera muelleri Exposed to Light Limitation
Source: PubMed Central journal article supplement (PMC4655411; doi:10.1038/srep17051), 2015-11-23
Supplement: srep17051-s1.pdf [file srep17051-s1.pdf]

**EVALUATION OF REFERENCE GENES FOR RT-QPCR STUDIES IN THE SEAGRASS *ZOSTERA MUELLERI* EXPOSED TO LIGHT LIMITATION**

**AUTHOR NAMES AND AFFILIATIONS**

SCHLIEP, M.<sup>a,\*,+</sup>, PERNICE, M.<sup>a,\*,+</sup>, SINUTOK, S.<sup>a</sup>, BRYANT, C.V.<sup>b</sup>, YORK, P. H.<sup>b</sup>, RASHEED, M.A.<sup>b</sup>, RALPH, P.J.<sup>a</sup>

<sup>a</sup> Plant Functional Biology and Climate Change Cluster (C3), University of Technology Sydney, 15 Broadway, Ultimo, 2007, NSW, Australia

<sup>b</sup> TropWATER - Centre for Tropical Water and Aquatic Ecosystem Research, James Cook University, 1-88 McGregor Road, Smithfield, 4878, QLD, Australia

<sup>+</sup> Both authors contributed equally.

<sup>\*</sup> Corresponding authors

email: martin.schliep@uts.edu.au; telephone: +61 2 9514 4162

email: mathieu.pernice@uts.edu.au; telephone: +61 2 9514 4162

**This PDF file includes:**

Supplementary Figure S1

### Supplementary Figure S1

Supplementary information including standard curves, efficiency and R-square for all the reference and target genes investigated in this study: S4 (A); AHCY (B); 18S (C); Actin (D); PolyA (E); GADPH (F); TubB (G); Calmo (H); EloF1 (I); EloF2 (J); PSI (K); HSF (L).

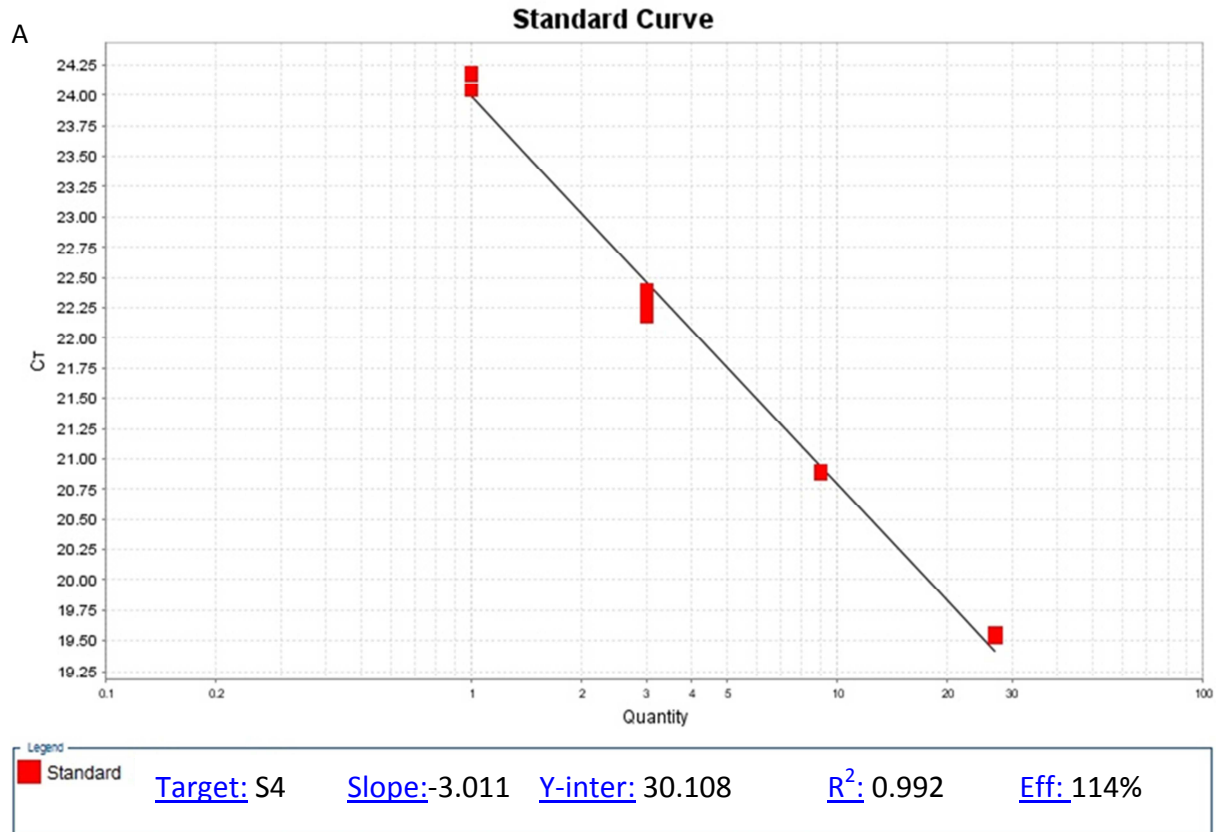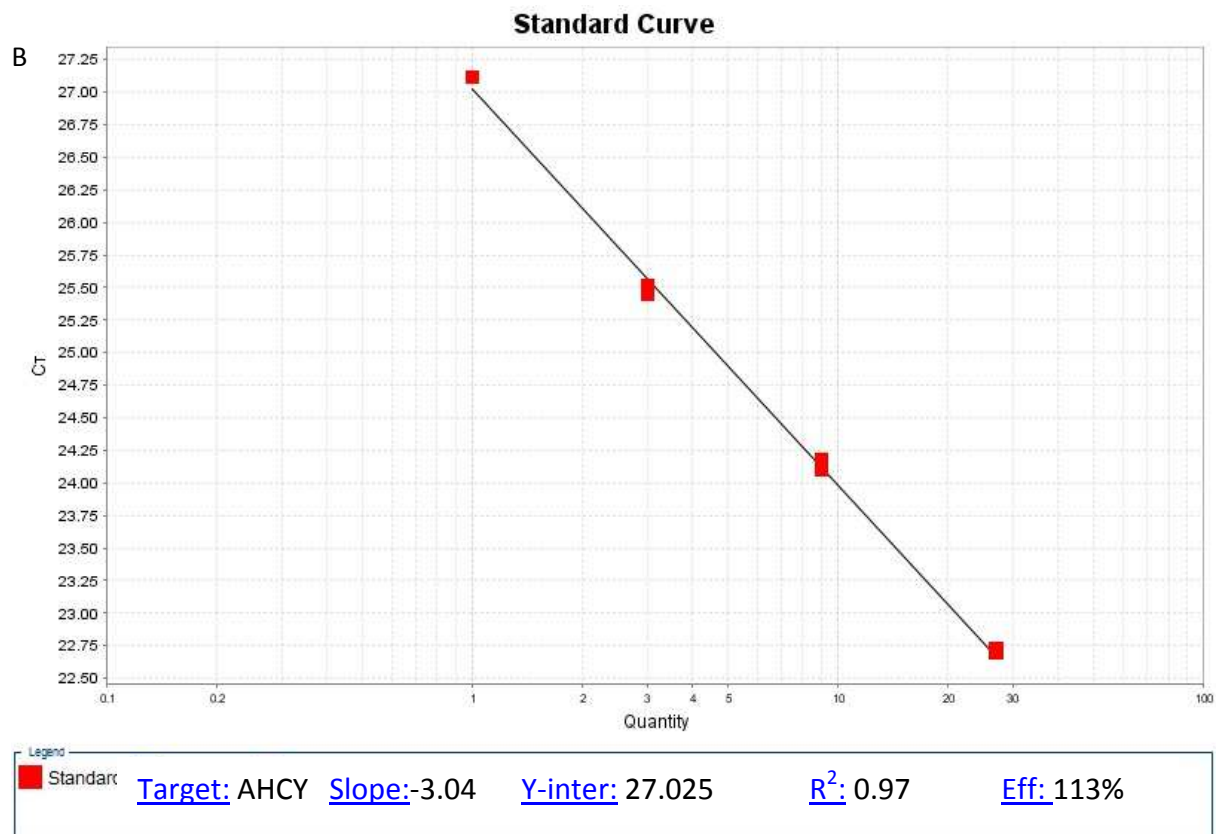

C

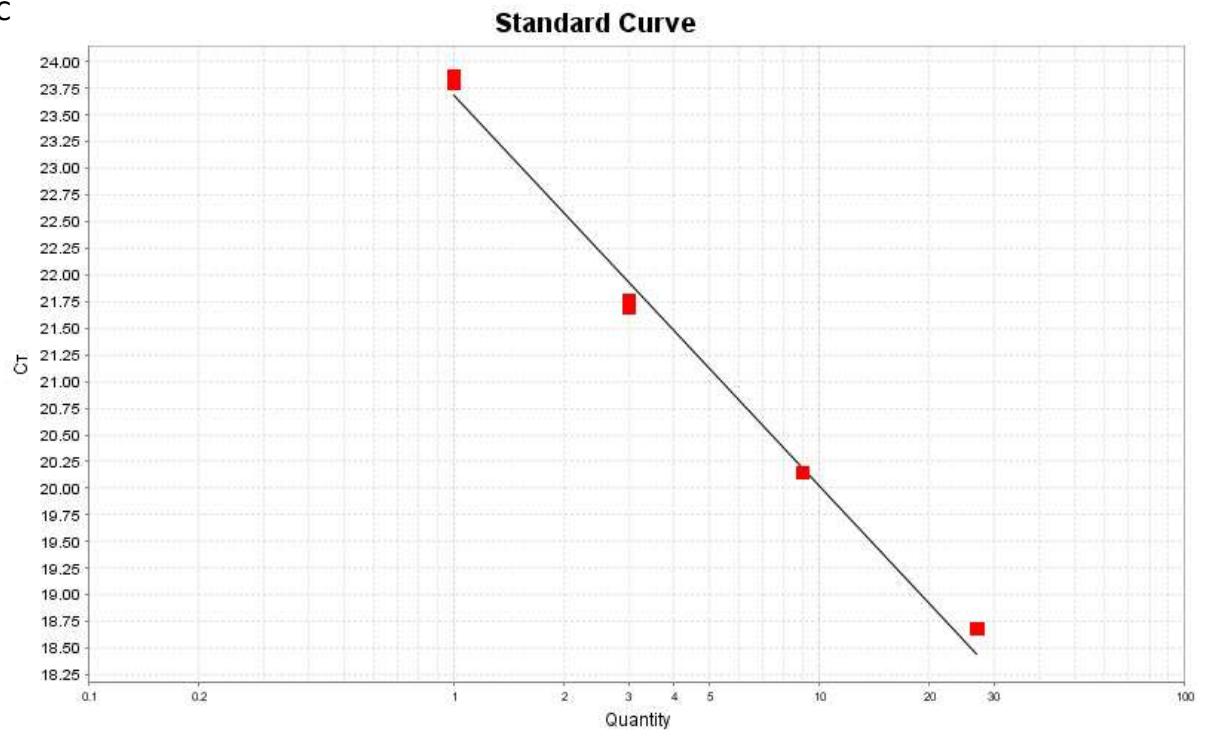

Legend: ■ Standard    [Target: 18S](#)    [Slope: -3.657](#)    [Y-inter: 23.681](#)    [R<sup>2</sup>: 0.99](#)    [Eff: 88%](#)

D

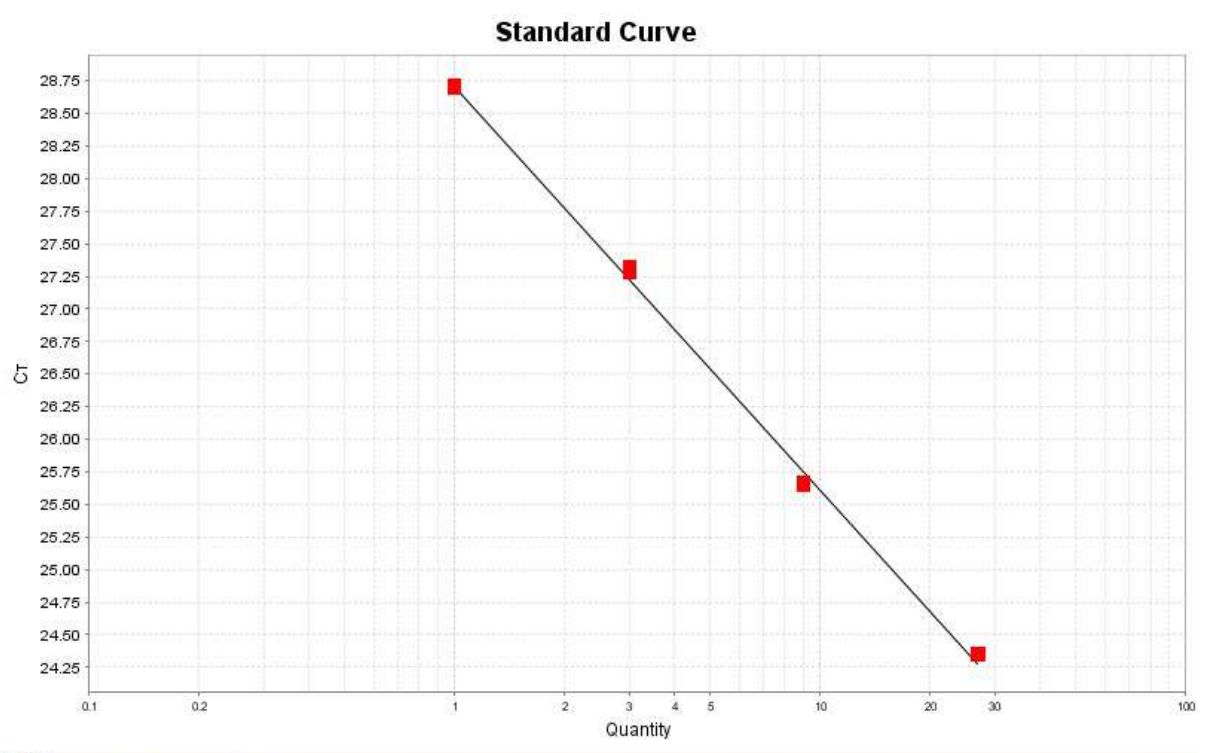

Legend: ■ Standard    [Target: Actin](#)    [Slope: -3.094](#)    [Y-inter: 28.708](#)    [R<sup>2</sup>: 0.998](#)    [Eff: 110%](#)

E

Standard Curve

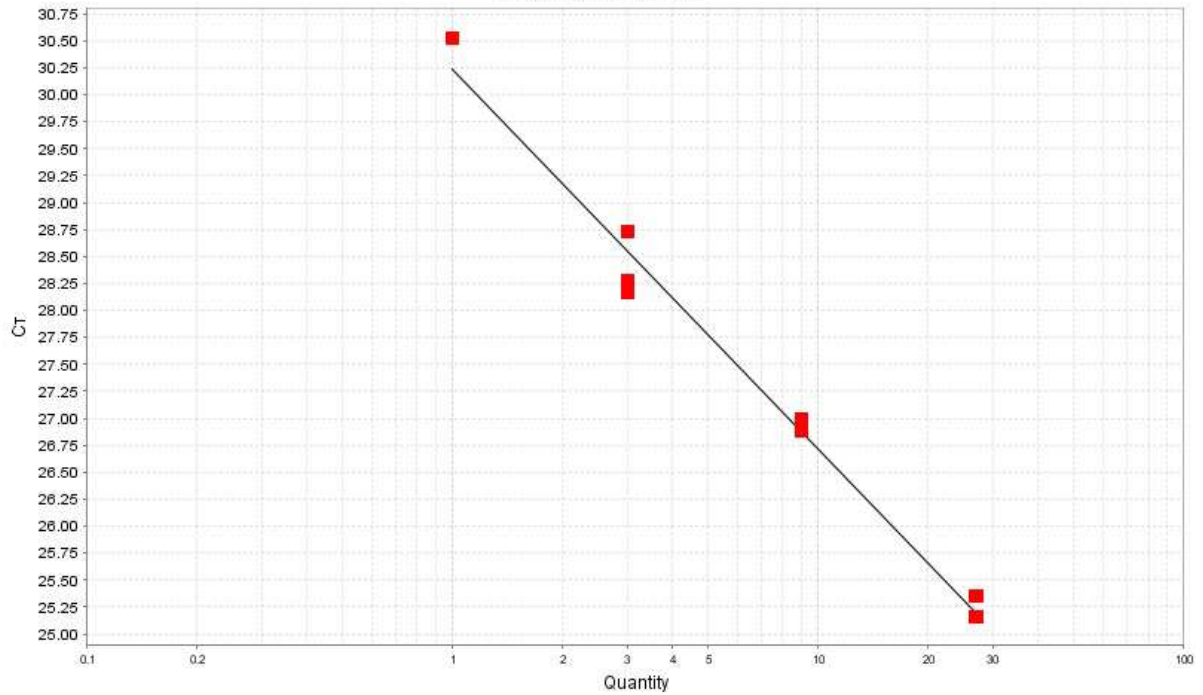

Legend  
■ Standard [Target: PolyA](#) [Slope: -3.509](#) [Y-inter: 30.229](#) [R<sup>2</sup>: 0.983](#) [Eff: 93%](#)

F

Standard Curve

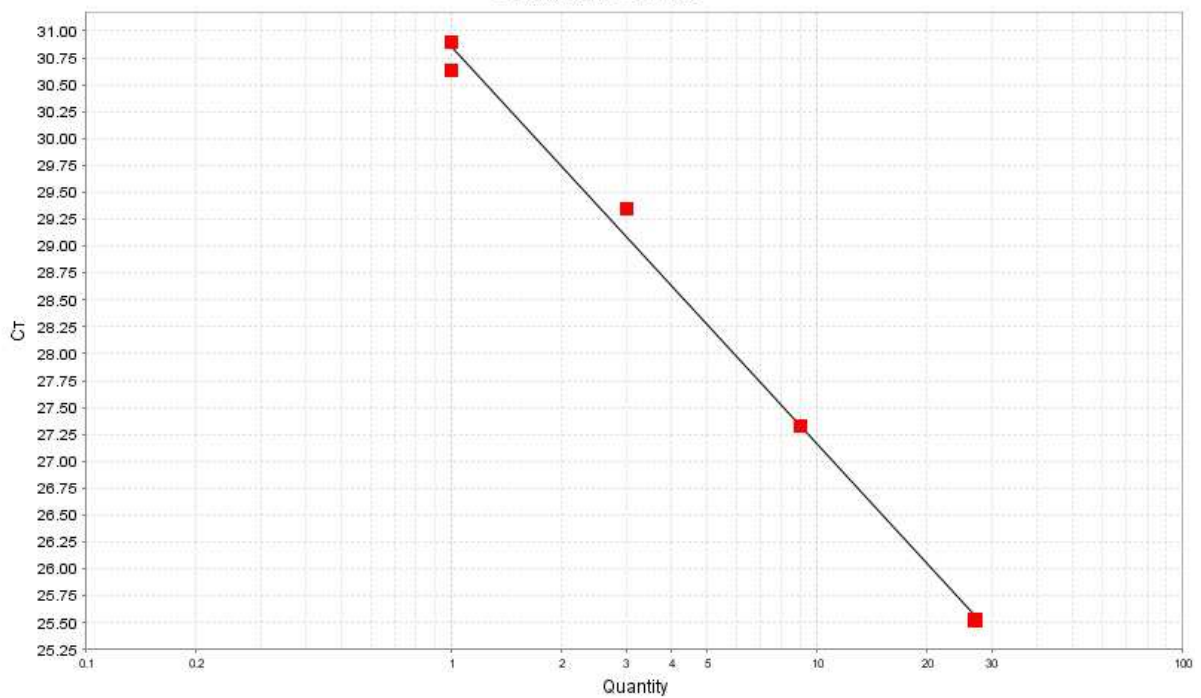

Legend  
■ Standard [Target: GADPH](#) [Slope: -3.662](#) [Y-inter: 30.816](#) [R<sup>2</sup>: 0.994](#) [Eff: 88%](#)

G

Standard Curve

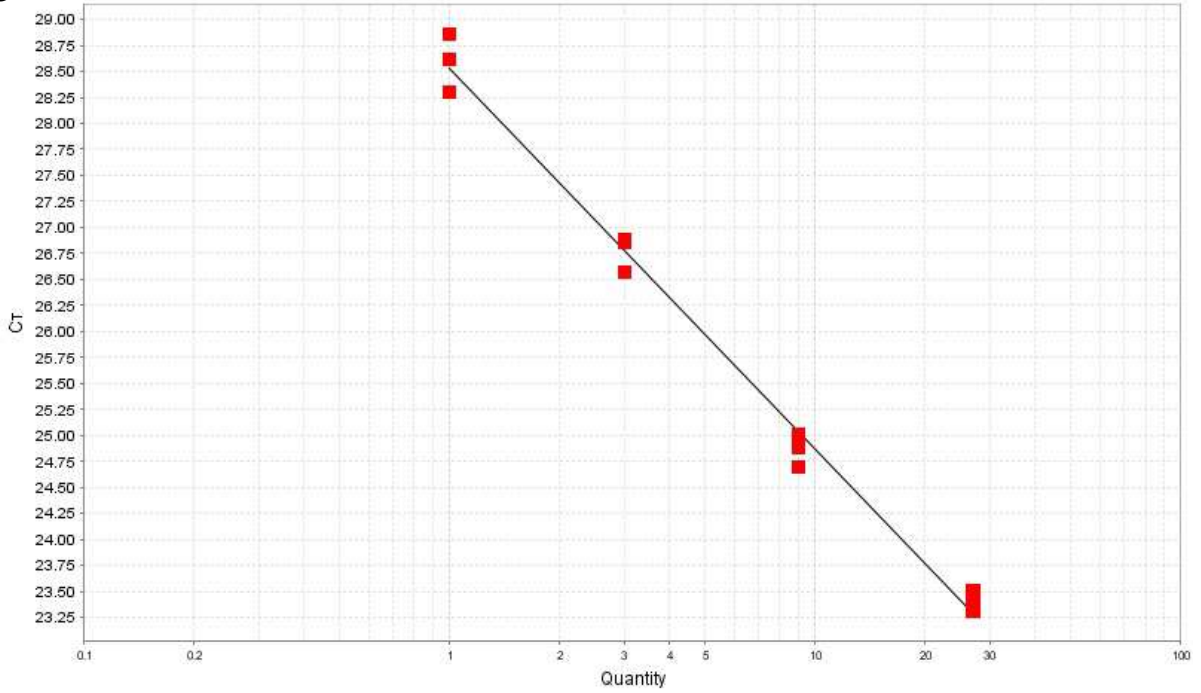

Legend  
■ Standard [Target: TubB](#) [Slope: -3.654](#) [Y-inter: 28.527](#) [R<sup>2</sup>: 0.99](#) [Eff: 88%](#)

H

Standard Curve

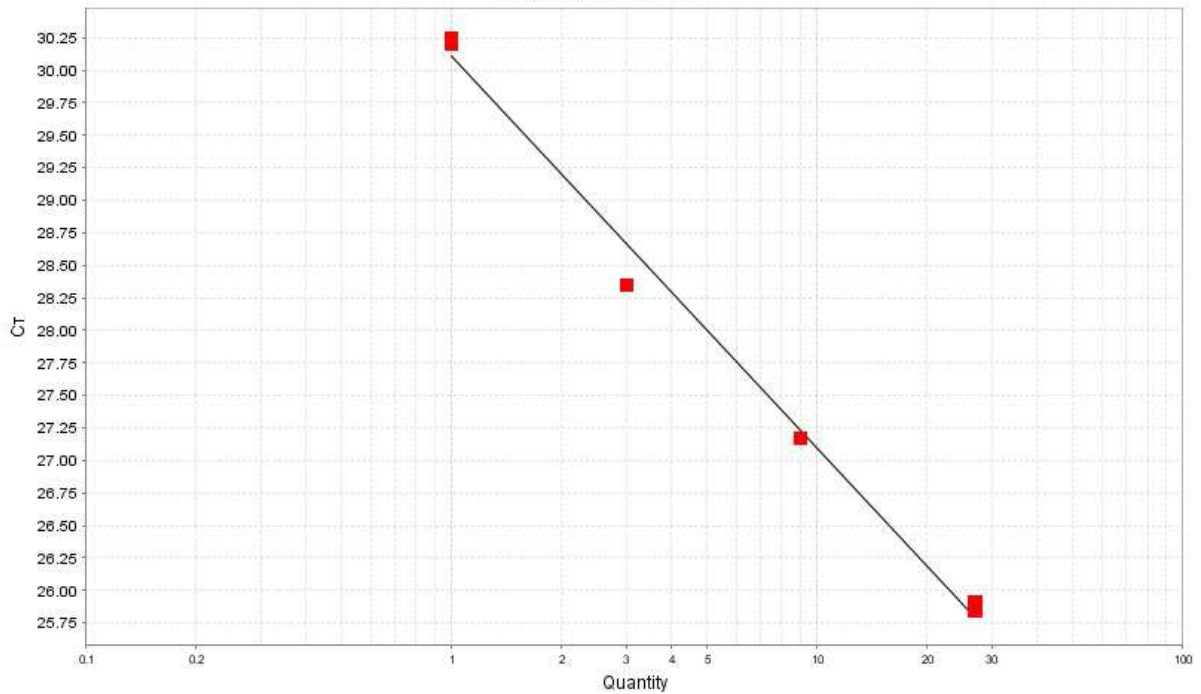

Legend  
■ Standard [Target: Calmo](#) [Slope: -3.011](#) [Y-inter: 30.108](#) [R<sup>2</sup>: 0.992](#) [Eff: 114%](#)

I

Standard Curve

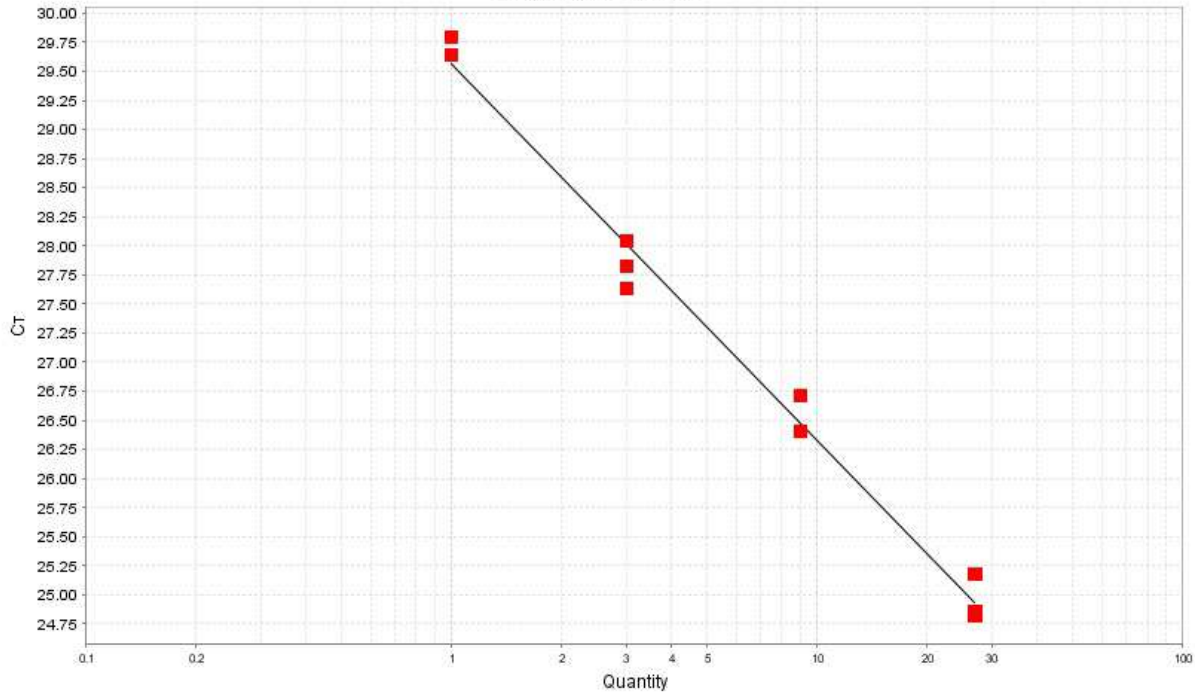

Legend  
Standard [Target: EloF1](#) [Slope: -3.237](#) [Y-inter: 29.564](#) [R<sup>2</sup>: 0.987](#) [Eff: 104%](#)

J

Standard Curve

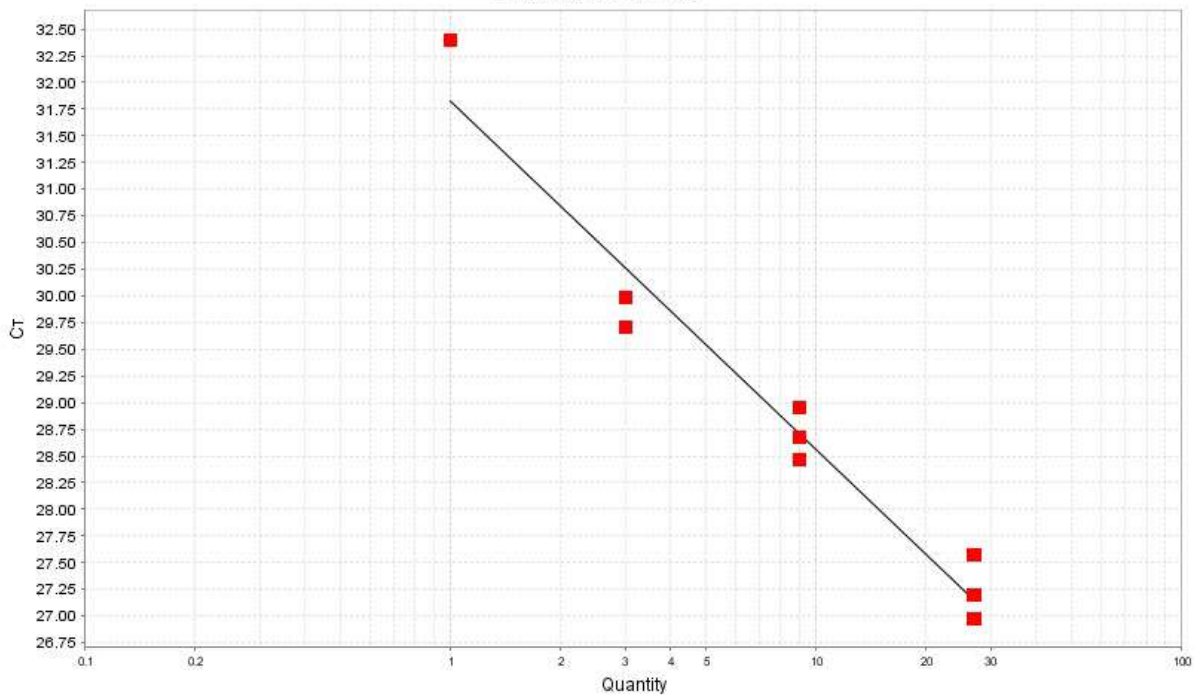

Legend  
Standard [Target: EloF2](#) [Slope: -3.267](#) [Y-inter: 31.826](#) [R<sup>2</sup>: 0.953](#) [Eff: 102%](#)

K

Standard Curve

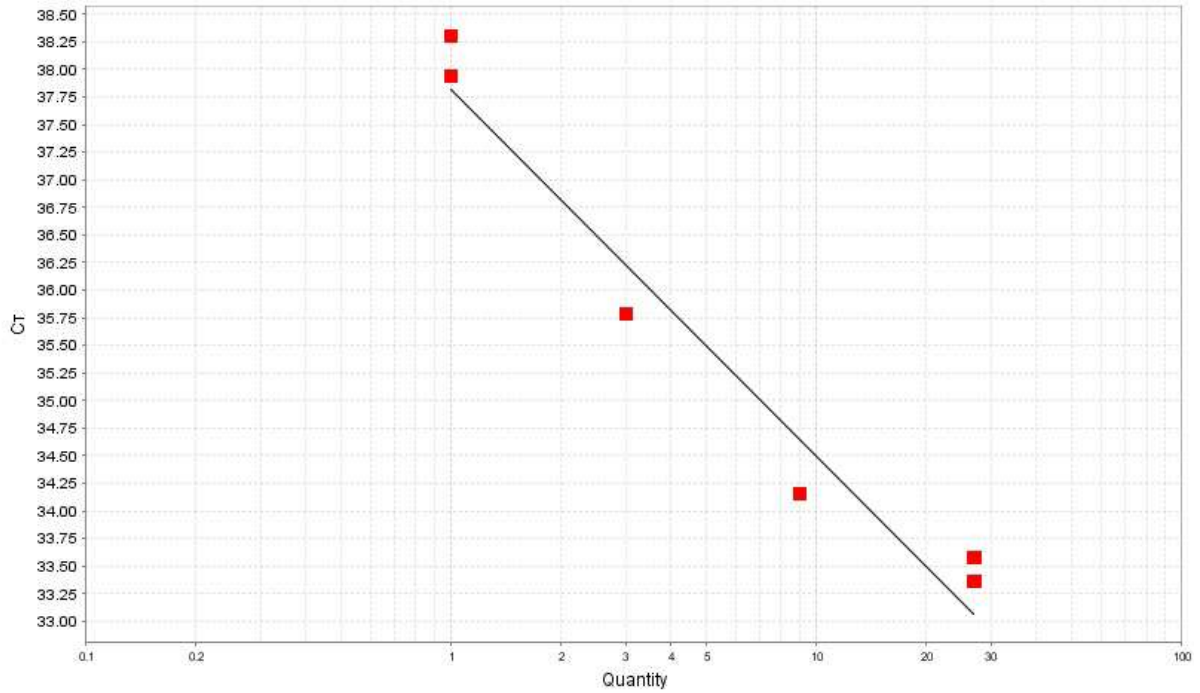

Legend: ■ Standard

[Target: PSI](#)   [Slope: -3.315](#)   [Y-inter: 37.812](#)   [R<sup>2</sup>: 0.95](#)   [Eff: 100%](#)

L

Standard Curve

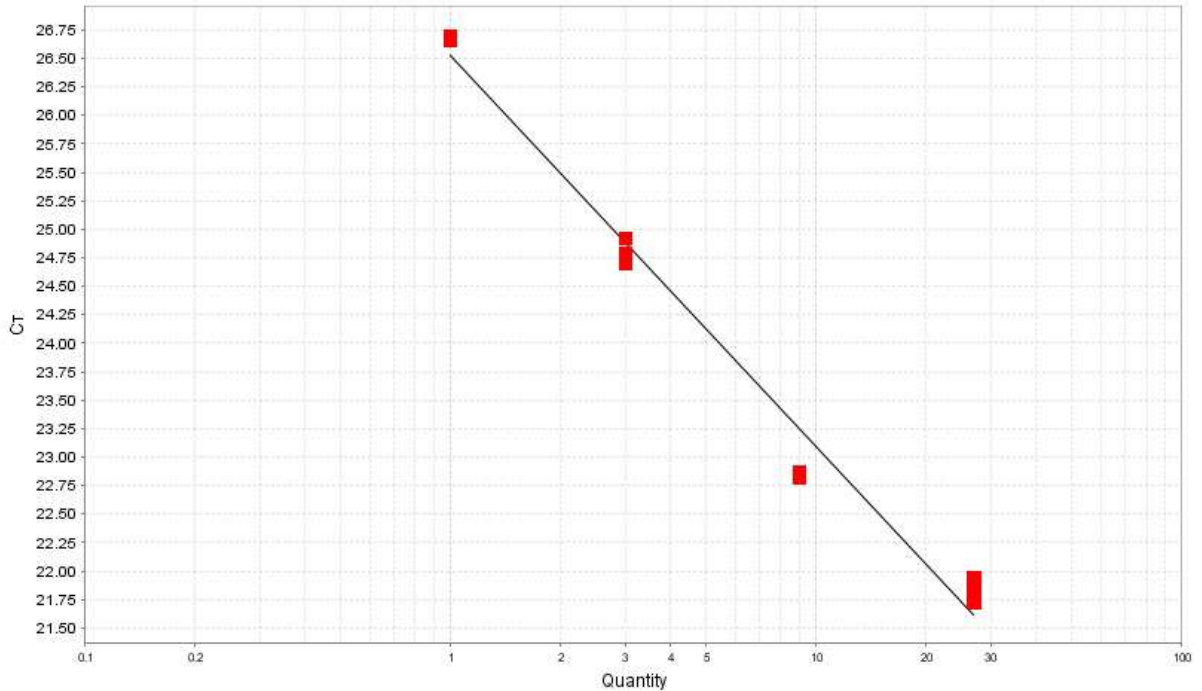

Legend: ■ Standard

[Target: HSF](#)   [Slope: -3.429](#)   [Y-inter: 26.525](#)   [R<sup>2</sup>: 0.984](#)   [Eff: 95%](#)
